1           **Genomic analysis of patient-derived xenograft models reveals intra-tumor**

2           **heterogeneity in endometrial cancer and can predict tumor growth inhibition with**

3           **talazoparib**

4   **Running title:** Genomics and PARP inhibition of endometrial cancer models

6 Vanessa F. Bonazzi<sup>1,2\*</sup>, Olga Kondrashova<sup>3\*</sup>, Deborah Smith<sup>4,5,6</sup>, Katia Nones<sup>3</sup>, Asmerom T.

7 Sengal<sup>1</sup>, Robert Ju<sup>1</sup>, Leisl M. Packer<sup>1</sup>, Lambros T. Koufariotis<sup>3</sup>, Stephen H. Kazakoff<sup>3</sup>, Aimee

8 L. Davidson<sup>3,6</sup>, Priya Ramarao-Milne<sup>3,6</sup>, Vanessa Lakis<sup>3</sup>, Felicity Newell<sup>3</sup>, Rebecca Rogers<sup>5</sup>,

9 Claire Davies<sup>5</sup>, James Nicklin<sup>7,8</sup>, Andrea Garrett<sup>7,8</sup>, Naven Chetty<sup>4,5</sup>, Lewis Perrin<sup>4,5</sup>, John V.

10 Pearson<sup>3</sup>, Ann-Marie Patch<sup>3,6</sup>, Nicola Waddell<sup>3</sup>, Pamela Pollock<sup>1^</sup>

11 1. School of Biomedical Sciences, Institute of Health and Biomedical Innovation, Queensland

12 University of Technology located at the Translational Research Institute, Brisbane, QLD, Australia

13 2. The University of Queensland Diamantina Institute, The University of Queensland,

14 Woolloongabba, QLD, Australia

15 3. Department of Genetics and Computational Biology, QIMR Berghofer Medical Research Institute,

16 Brisbane, QLD, Australia

17 4. Mater Health Services, South Brisbane, QLD, Australia

18 5. Mater Pathology, Mater Research, Brisbane, QLD, Australia

19 6. The University of Queensland, Brisbane, QLD, Australia

20 7. The Wesley Hospital, Auchenflower, QLD, Australia

21 8. Icon Cancer Centre Wesley, Auchenflower, QLD, Australia

23 **Corresponding author:** Pamela Pollock +61 7 3443 7237, [pamela.pollock@qut.edu.au](mailto:pamela.pollock@qut.edu.au)

24 \* These authors contributed equally to this work

26 **Keywords:** endometrial cancer, patient-derived xenografts, genomic characterization, mutational

27 signatures, genomic scarring, tumour heterogeneity, homologous recombination, PARP inhibitors

28 **Abstract**

29 **Background:** Endometrial cancer (EC) is a major gynecological cancer with increasing  
30 incidence. It comprised of four molecular subtypes with differing etiology, prognoses, and  
31 response to chemotherapy. In the future, clinical trials testing new single agents or combination  
32 therapies will be targeted to the molecular subtype most likely to respond. Pre-clinical models  
33 that faithfully represent the molecular subtypes of EC are urgently needed, we sought to  
34 develop and characterize a panel of novel EC patient-derived xenograft (PDX) models.

35 **Methods:** Here, we report whole exome or whole genome sequencing of 11 PDX models and  
36 the matched primary tumor. Analysis of multiple PDX lineages and passages was performed  
37 to study tumor heterogeneity across lineages and/or passages. Based on recent reports of  
38 frequent defects in the homologous recombination (HR) pathway in EC, we assessed  
39 mutational signatures and HR deficiency scores and correlated these with *in vivo* responses to  
40 the PARP inhibitor (PARPi) talazoparib in six PDXs representing the different molecular  
41 subtypes of EC.

42 **Results:** PDX models were successfully generated from all four molecular subtypes of EC and  
43 uterine carcinosarcomas, and they recapitulated morphology and the molecular landscape of  
44 primary tumors without major genomic drift. We also observed a wide range of inter-tumor  
45 and intra-tumor heterogeneity, well captured by different PDX lineages, which could lead to  
46 different treatment responses. An *in vivo* response to talazoparib was detected in two p53mut  
47 models consistent with stable disease, however both lacked the HR deficiency genomic  
48 signature.

49 **Conclusions:** EC PDX models represent the four molecular subtypes of disease and can  
50 capture intra-tumoral heterogeneity of the original primary tumor. PDXs of the p53mut  
51 molecular subtype showed sensitivity to PARPi, however, deeper and more durable responses  
52 will likely require combination of PARPi with other agents.

## 53 **Introduction**

54 Endometrial cancer (EC) is the most common gynecological malignancy in developed  
55 countries with increasing annual rates (1). Whilst most ECs are detected early and have good  
56 prognosis, patients with metastatic disease (15%) or who relapse after surgery (~15%) have a  
57 median survival of less than 12 months (2).

58

59 EC is comprised of multiple histological subtypes, including low and high-grade endometrioid,  
60 those with serous and clear cell histology and uterine carcinosarcomas. The Cancer Genome  
61 Atlas (TCGA) identified four molecular subtypes: *POLE* mutant (excellent prognosis),  
62 mismatch repair deficient (MMRd; intermediate prognosis), *TP53* wildtype (p53wt;  
63 intermediate prognosis), and *TP53* mutant (p53mut; worst prognosis) (3). Multiple laboratories  
64 have confirmed the different prognoses associated with these subtypes, using a combination of  
65 surrogate immunohistochemistry stains or loss of heterozygosity (LOH) analyses and limited  
66 sequencing (2, 4-7). Genomic studies of uterine carcinosarcomas (UCS), have also revealed  
67 the presence of similar subtypes, however, the majority of tumors (~90%) contain *TP53*  
68 mutations and a low tumor mutation burden (TMB) (8-10).

69

70 Apart from the recent approval of immune checkpoint inhibitors (ICIs) for MMRd cancers,  
71 there has been little development in terms of precision medicine for EC. Surgery, radiotherapy  
72 and chemotherapy still remain the main treatment options. In recent years, there has been a  
73 growing interest in applying PARP inhibitors (PARPi) for treatment of EC. PARPi have proven  
74 to be incredibly effective in cancers with HR deficiency, such as ovarian and breast cancers  
75 with *BRCA1/2* mutations. In EC, PARPi sensitivity was originally reported in cell lines with  
76 PTEN protein loss identified as a predictive marker (11), however this was later refuted using  
77 a larger panel of cell lines (12). PARPi sensitivity in EC has also been associated with loss of

78 MRE11 protein in EC cell lines (13), and mutations in *ARID1A* (which commonly occur in  
79 EC) in cell lines from other cancers (14). Recently, a pan-cancer analysis of bi-allelic  
80 alterations in HR DNA repair genes revealed ~15% of ECs have a combination of germline  
81 and/or somatic bi-allelic mutations and/or LOH (15). Another study of TCGA data reported  
82 that ~50% of non-endometrioid ECs (~90% p53mut) show a mutational or copy number  
83 signature associated with defective HR (16).

84

85 New targeted therapies, such as PARPi, need to be tested in pre-clinical models that accurately  
86 recapitulate the molecular characteristics of patient tumors. In EC, there are a few cell lines  
87 derived from UCS and serous ECs. Although multiple cell lines from endometrioid ECs carry  
88 *TP53* mutations, almost all of these cell lines are also MMRd and show a high TMB suggesting  
89 the *TP53* mutations are acquired through culturing, hence these cell lines are not good models  
90 for poor prognosis p53mut EC as they do not recapitulate the biology of this subtype.  
91 Identification of effective therapies and predictive biomarkers for p53mut ECs requires well-  
92 characterized pre-clinical models that recapitulate this molecular subtype. Patient-derived  
93 xenografts (PDX) have been previously demonstrated as reliable pre-clinical models for  
94 assessing treatment responses, if carefully characterized.

95

96 In this study we performed in-depth genomic characterization of EC PDX models to define  
97 their suitability as pre-clinical models and predict HR deficiency status by assessing genomic  
98 scars. Here, we report *in vivo* responses to the potent PARPi talazoparib in a panel of MMRd  
99 and p53 mutant PDX models, and correlate these responses with genomic features.



## 100 **Materials and Methods**

### 101 *Patient samples*

102 All samples were obtained from patients with informed consent and the study has human ethics  
103 approval from the Mater Health Services Human Research Ethics Committee  
104 (HREC/15/MHS/127), UnitingCare Health Human Research Ethics Committee (1116),  
105 Queensland University of Technology (1500000169, 1500000323) and QIMR Berghofer  
106 (P3478, P2095). Clinical data including tumor stage, grade, chemotherapy treatment and  
107 survival status was collected (Additional File 1:Table S1). Fresh tissue was obtained from  
108 patients undergoing surgery for EC and transported to the laboratory on ice in RPMI, 10%  
109 FBS. The remainder was fixed in formalin and embedded in paraffin (FFPE). Where possible,  
110 a blood sample was also obtained for sequencing analysis.

111

### 112 *Mouse PDX models*

113 PDX establishment and passaging was performed according to animal ethics approvals at TRI  
114 (TRI/021/19) and QUT (1900000701). Fresh primary tumors (n=33) were transplanted into  
115 immunocompromised Nod Scid Gamma (NSG) mice within 4 hours of surgery. When  
116 transplantation could not be performed immediately, tumors were either stored at 4°C overnight  
117 in transport media (n=9) or viably frozen (n=11). Each sample was cut into approximately 1-2  
118 mm<sup>3</sup> pieces and placed on ice in a 1:1 solution of RPMI:Matrigel. Mice were anaesthetized and  
119 a single tumor piece was inserted subcutaneously in the subscapular region (2-4 mice). PDX  
120 engraftment was then assessed weekly using micro-calipers. Once a tumor reached a volume  
121 of ~750-1000mm<sup>3</sup>, mice were euthanized using CO<sub>2</sub> and several 1-2mm<sup>3</sup> fragments were  
122 transplanted subcutaneously into the next generation of mice. A slice of each PDX was  
123 preserved as FFPE, as well as frozen for DNA extraction. Haematoxylin and eosin (H&E)

124 slides were examined by an anatomical pathologist to determine the histology of each PDX  
125 passage and original patient tumor.

126

### 127 *In vivo drug testing*

128 *In vivo* drug studies were performed according to animal ethics approvals at TRI and QUT  
129 (QUT/275/17 and 1700000755). Mice were implanted with PDX fragments from 6-10 weeks  
130 of age. Once tumors reached ~150-350 mm<sup>3</sup> (faster models started drug between 150-250 mm<sup>3</sup>  
131 and slower models between 250-350 mm<sup>3</sup>), mice were randomized into treatment groups and  
132 treated for 28 days via oral gavage. Efforts were made to have a similar number of mice on  
133 each arm from each passage carrying similar sized tumors. Mice were drugged 6 days on/1 day  
134 off with vehicle (20% Tween 20, 20% DMSO) or talazoparib (0.33mg/kg) as previously  
135 reported (17).

136

### 137 *DNA extraction and quality control*

138 DNA was extracted from patient blood samples as well as patient and related PDX tumor  
139 samples, using DNeasy Blood & Tissue Kits (Qiagen, Germantown, MD, USA). The purity of  
140 DNA was assessed using NanoDrop and quantified using the Qubit dsDNA BR assay (Thermo  
141 Fisher Scientific, MA, USA). DNA samples were assayed with the Omni 2.5-8, V1.0 and V1.1  
142 Illumina BeadChip as per manufacturer's instructions (Illumina, San Diego, CA, USA). SNP  
143 array analysis to confirm sample identity, tumor content of DNA samples (18) for subsequent  
144 sequencing is described in detail in the Additional File 1:Supplementary Material.

145

### 146 *Whole exome and whole genome sequencing*

147 Samples underwent whole-exome sequencing (WES) and whole-genome sequencing (WGS).  
148 The WES libraries were prepared using the SureSelect capture V5+UTR kit (Agilent, Santa

149 Clara, CA, USA) and sequenced with 100bp paired-end sequencing on a HiSeq 2500/4000  
150 (Illumina) to a targeted 100-fold read depth. The WGS libraries were prepared using the  
151 TruSeq Nano kit (Illumina) and sequenced with 150bp paired-end sequencing on a HiSeq X  
152 Ten (Illumina) at Macrogen (Geumcheon-gu, Seoul, South Korea) with targeted mean read  
153 depth of 60x for primary tumor samples and 30x for matched PDX and normal samples.

154

#### 155 *Sequencing data analysis*

156 Cutadapt (v1.18)(19) was used to trim low-quality 3' bases (`-q 20`) and remove adapters  
157 before alignment to a combined human/mouse (GRCh37/GRCm38 Nodshiltj background)  
158 reference using BWA-mem (v0.7.15)(20), and sorted and indexed using SAMtools (v1.9) (21).  
159 Duplicate reads were marked using Picard MarkDuplicates (v1.97). Human mutation calling  
160 process only used read-pairs aligned to the human sequences with a mapping quality score of  
161 60. Quality assessment and coverage estimation was carried out by in-house developed tools,  
162 qProfiler and qCoverage. Downstream analysis included variant calling, copy number  
163 alteration (CNA) and structural variant (SV) detection (22-24), heterogeneity analysis (25, 26),  
164 microsatellite instability (MSI) and HR deficiency (HRD) status assessment (27, 28), and  
165 signature analysis (29, 30), and is described in detail in the Additional File 1:Supplementary  
166 Material.

167

168 Publicly available datasets (TCGA uterine corpus endometrial carcinoma (UCEC) and TCGA-  
169 UCS) were processed using a similar approach, without the initial human/mouse alignment and  
170 filtering step.

171

#### 172 *Statistical analysis and data visualization*

173 Statistical analysis and data visualization was performed in R 3.5.1, using ggplot2 and  
174 ComplexHeatmap packages, and using Circos. Final figure formatting was done with  
175 Illustrator (Adobe).

176

## 177 **Results**

### 178 *Established PDX models represent four histological subtypes*

179 Of 33 EC tumors implanted fresh, we generated 15 EC PDXs which were confirmed as EC  
180 models by a specialized anatomical pathologist. Successful engraftment rates were only  
181 obtained for histological grades 2 and 3 tumors implanted fresh (33 and 68%, respectively),  
182 none of grade 1 tumors engrafted (0/8) (Tables S1-2). We were also able to obtain 3 EC PDX  
183 models from an additional 20 EC tumors after storage at -80°C or 4°C overnight (Additional  
184 File 1:Table S2). In addition to 18 EC PDXs, seven models showed *in vivo* tumor growth,  
185 however these were confirmed to be lymphomas based on positive leukocyte common antigen  
186 staining. This occurred more often from grade 1 tumors (3/14, 21%) than grade 3 ECs (3/28,  
187 11%). This study reports detailed genomics data for 11 of 18 EC PDX models.

188

189 The 11 PDX models were from EC of patients with a mean age of 70 (range 43-86 years,  
190 Additional File 1:Table S2) who represented the wide range of EC disease with varying  
191 histology and stages (IA to IIIB). Histologic diagnoses included carcinosarcoma (n=3), mixed  
192 endometrioid and serous (n=2), mixed endometrioid and clear cell (n=1) and endometrioid  
193 (n=5, of which 4 were FIGO grade 3 and 1 FIGO grade 2). Nine patients received radiation or  
194 chemoradiation and six patients recurred, five of which have subsequently died. In all models,  
195 the tissue architecture, the epithelial compartment and the global histological classification  
196 features were preserved in the corresponding F0 to F2 PDXs (Fig. 1).

197

198 *Genomics of EC PDX models*

199 Sequencing and SNP array analysis were performed to molecularly classify the 11 EC PDX  
200 models. The molecular classification was adapted from the TCGA endometrial and UCS  
201 studies, and was based on five aspects (Fig. 2): commonly mutated genes (Additional File  
202 1:Table S3, Additional File 2: Table S4), TMB, MSI score (Figure S1), extent of genomic CNA  
203 (Additional File 1:Fig. S2), and mutational signatures (Additional File 1:Fig. S3). Four  
204 molecular subtypes were represented in the generated PDX models (Fig. 2, Additional File  
205 1:Fig. S4). One PDX model was *POLE*-mutated. It contained p.Pro286Arg *POLE* mutation in  
206 the exonuclease domain, previously reported in EC and shown to lead to a particularly strong  
207 mutator phenotype (31). This PDX was characterized by an ultra-high TMB (>600  
208 Mutations/Mb), a CNA stable genome, low MSI score (<3.5%) and a *POLE*-associated  
209 mutational signature. Two PDX models were classified as *TP53* wild-type (p53wt), since they  
210 lacked *TP53* or *POLE* mutations and were MSI-stable. They were characterized by a relatively  
211 low TMB, and moderately stable genomes. Five PDX models were classified as MMRd, based  
212 on a high TMB (>20 Mutations/Mb), high MSI scores, and MMRd-associated mutational  
213 signatures.

214

215 All three UCS models were classified as *TP53* mutant (p53mut), as they all harbored hotspot  
216 or deleterious somatic *TP53* mutations, low TMB (<10 Mutations/Mb), high degree of genomic  
217 instability (>25% of genome with CNAs and >15 CN segments) and low MSI scores,  
218 suggesting microsatellite stability. The UCS models had a mixed mutational signature profile,  
219 with no dominant signature detected (<30% of somatic mutations attributed to a single  
220 signature; Additional File 1:Fig. S3).

221

222 Molecular subtyping of two models with serous histology revealed one was p53wt tumor  
223 (PDX23) and another was MMRd (PDX53), which was consistent with a germline *MSH6*  
224 mutation (p.Tyr214\*) in the latter patient and the finding that 13% of patients with germline  
225 MMR mutations have a mixed serous histology (32). Somatic mutations detected in other genes  
226 were consistent with TCGA findings. Protein altering somatic variants were commonly  
227 detected in *PTEN*, *ARID1A*, *PIK3CA*, *KRAS* and *CTNNB1* genes. All MMRd models contained  
228 somatic *PTEN* and *ARID1A* mutations, most of which were inactivating frameshift or nonsense  
229 mutations (Fig. 2, Additional File 2:Table S4).

230

### 231 *Variable intra-tumor heterogeneity observed in MMRd PDX models*

232 To study the intra-tumor heterogeneity and to evaluate how well the PDX models recapitulate  
233 primary tumors, we focused in detail on four MMRd models as these might be expected to  
234 accumulate changes during passaging based on their defective DNA mismatch repair. Genome-  
235 wide levels of CNA and LOH changes were comparable between primary and PDX tumor  
236 samples (Fig. 3a, Additional File 1:Fig. S5). The TMB between primary tumor and different  
237 passages of PDX (passage 0-4) was stable across different passages of PDX samples; however  
238 we observed a substantially higher number of mutations in PDX samples compared with  
239 matched primary samples in three PDX models (Fig. 3b). This was likely due to lower tumor  
240 purity observed in the primary samples compared with PDX samples (Additional File 1:Fig.  
241 S6). Indeed, PDX59 with the highest tumor purity had the most comparable number of somatic  
242 mutations to the matched PDX samples. For three of four models, 83-99% of the somatic  
243 substitutions in the primary tumor were also detected in all tested PDX samples, with only  
244 limited heterogeneity observed between different lineages of the PDX (Fig. 3c and Additional  
245 File 1:Fig. S7). In PDX58 however, we observed that the established PDX shared only a third  
246 of its somatic substitutions with the primary tumor sample (Fig. 3d). A clonality analysis of

247 PDX58 using PyClone identified two distinct mutational clones (PDX lineages A and B) that  
248 likely diverged early in the tumor evolution and were unintentionally selected during the initial  
249 tumor transplantation (Fig. 3e-f). Mutations unique to lineage A included an activating *KRAS*  
250 mutation (p.Gly12Asp) and a hotspot *TP53* mutation (p.Arg273His). Overall, since the greatest  
251 variability was observed between different lineages of the established PDX models and not  
252 between the passages, we concluded that this was due to spatial heterogeneity present in the  
253 original patient tumor.

254

255 *Variable intra-tumor heterogeneity observed in p53mut uterine carcinosarcoma PDX models*

256 To capture the genome instability and heterogeneity observed in the *p53mut* UCS models, we  
257 performed WGS to examine CNA changes in more detail. The overall CNA and LOH changes  
258 were comparable between the primary and matched PDX samples, with the exception of  
259 PDX03 model (Fig. 4a, Additional File 1:Fig. S8), which harbored a whole-genome duplication  
260 (WGD) not detected in the primary tumor. The total number of somatic mutations detected  
261 across the whole genome for each UCS model was consistent between the primary tumor and  
262 the matched PDX samples, with no increase in mutation number detected with passaging (Fig.  
263 4b).

264

265 For PDX03, which contained a WGD in the PDX and not the matched primary tumor, PyClone  
266 clonality analysis revealed a high degree of heterogeneity in the model, with five major  
267 different mutational clones detected (Fig. 4c-e) that were associated with multiple samples in  
268 PDX lineages A and B. Clone 2 was the predominant clone in the primary tumor sample  
269 (predicted in around 80% of tumor cells), but was detected at only around 15% in lineage A,  
270 and was absent in lineage B. Interestingly, using Battenberg we identified a CNA subclone in  
271 lineage A with a similar copy number profile to the primary tumor (Additional File 1:Fig. S9a-

272 d). In support of this, the ploidy estimated from SNP array analysis of the additional PDX  
273 samples, identified two early lineage samples (passage 0 and 1) from lineage A that had  
274 estimated ploidy of 2, same as the primary tumor sample (Additional File 1:Fig. S9e). We  
275 therefore concluded that the WGD event was already present in a subclone of the primary  
276 tumor, although not detected in the sample taken for WGS analysis. In the other two  
277 carcinosarcoma models, clonality analysis also revealed heterogeneity, although not to the  
278 same extent as seen in the PDX03 model (Additional File 1:Fig. S10-11).

279

#### 280 *Assessment of PARPi responses and HR status in PDX models*

281 Since the established PDX models were found to reflect the primary tumors, we evaluated their  
282 use for testing molecularly-targeted treatments. Potential therapeutic options for all 11 PDX  
283 models were identified using their genomic profiles and Cancer Genome Interpreter analysis  
284 (Additional File 1:Fig. S12). Multiple therapeutic options were identified, with three or more  
285 options detected per PDX model. PARP, mTOR and PI3K pathway inhibitors, as well as PD1  
286 inhibitors were identified among the most common potential treatment options. However, a  
287 large number of therapeutic agents were identified for tumors with a high TMB  
288 (POLE/MMRd), where most somatic variants could be passenger events, thus functional  
289 testing is required to determine whether these models are responsive.

290

291 PARPi has been previously identified as a promising therapeutic strategy for EC. Therefore,  
292 we evaluated PARPi responses in a subset of the established PDX models. Highly potent  
293 PARPi talazoparib was selected due to its significantly higher PARP trapping ability (33) and  
294 was used to treat three UCS PDX models, one p53wt model and two MSI models *in vivo* (Fig.  
295 5). PDX03 and PDX49 showed the most sensitivity, with average tumor growth inhibition  
296 (TGI) showing the equivalent of stable disease by Response Evaluation Criteria In Solid



297 Tumors (RECIST) criteria. PDX56 and PDX23 showed significant TGI, albeit this would  
298 translate to progressive disease by RECIST criteria. No effect of talazoparib was seen in the  
299 MMRd models with multiple heterozygous missense mutations and/or LOH in DNA repair  
300 genes (PDX12 and PDX53).

301

302 Due to the limited responses to single agent PARPi observed *in vivo*, we characterized the PDX  
303 HR status in detail. We firstly estimated the HRD scores for the primary and matched PDX  
304 samples with WGS or SNP array-estimated CNA data. All of the primary tumor samples had  
305 HRD scored below the threshold of  $\geq 42$ , a previously defined cut-off for HRD breast and  
306 ovarian cancers (34, 35). Two of three carcinosarcoma p53mut models and one p53wt model  
307 had some PDX samples with HRD scores just over the threshold (Fig. 6a).

308

309 We then assessed the mutational signatures, specifically contribution of COSMIC Signature 3,  
310 as an alternative marker of HRD. All three carcinosarcoma models had a low mutational  
311 contribution of Signature 3, between 20-30% (Fig. 6a). However, rearrangement signature  
312 analysis on the three carcinosarcoma models, did not detect *BRCA1/2*-associated signatures  
313 (Additional File 1:Fig. S13). Finally, we looked for the presence of germline and somatic  
314 mutations in the HR-associated genes (Additional File 1:Table S5) and somatic mutations in  
315 *PTEN* and *ARID1A*, since mutations in these genes have been associated with PARPi  
316 sensitivity in the pre-clinical setting (11, 14). Apart from recurrent damaging mutations in  
317 *PTEN* and *ARID1A*, we did not detect any clear driver mutations in HR-genes with evidence  
318 of enrichment or LOH in p53mut or p53wt groups. We did detect a large number of likely-  
319 passenger mutations in hypermutated models (MMRd/ POLE; Fig. 6a; Additional File 2:Table  
320 S6). The genomic characterization and the lack of *in vivo* tumor regressions in response to  
321 PARPi suggested that none of the PDX models had clear evidence of HRD.

322

323

324 *HR deficiency is predicted to be a rare event in UCEC and UCS*

325 Since we did not observe clear evidence of HRD in the PDX models, we wanted to estimate  
326 the rate of HRD in a larger cohort of unselected UCEC and UCS patients. We assessed HR  
327 status in the TCGA studies of endometrial carcinomas (TCGA-UCEC; n=560) and uterine  
328 carcinosarcomas (TCGA-UCS; n=57). *De novo* detection of mutational signatures identified  
329 six signatures associated with age, APOBEC, MMR and POLE, but not HRD-associated  
330 Signature 3 in either of the datasets (Additional File 1:Fig. S14). We then applied the same  
331 approach that was used for the PDX models — assigning known COSMIC signatures  
332 (including HRD Signature 3) to the mutational profiles of each sample. Only samples with >50  
333 somatic substitutions were selected for this analysis (n=591). Using this approach, we predicted  
334 that only 6.4% (38 of 591) of all analyzed samples had Signature 3 detected, using 15%  
335 minimum signature contribution cut-off to avoid overfitting (Fig. 6b). Signature 3 was detected  
336 in 11.4% (16/141) of non-endometrioid EC, 3.8% (15/393) of endometrioid EC and 12.3%  
337 (7/57) of UCS cases.

338

339 We also looked for germline and somatic variants in HR genes in these 591 samples (Fig. 6c,  
340 Additional File 2:Table S7). Only 2.5% (15/591) cases were found to harbor germline  
341 pathogenic or likely pathogenic HR gene variants: 3.5% (5/141) of non-endometrioid, 2.3%  
342 (9/393) of endometrioid and 1.8% (1/57) of UCS cases. Seven variants in *BRCA1*, *PALB2*,  
343 *RAD51C* and *RAD51D* genes were concurrent with the presence of mutational Signature 3;  
344 whereas the variants in *BRIP1*, *NBN*, *MRE11A* and *CHEK2*, as well as one variant in *RAD51B*,  
345 were detected in cases without Signature 3. This finding was in line with a previous report in  
346 breast cancer, where mutations in DNA-damage signaling pathway genes, such as *ATM* and

347 *CHEK2*, were not associated with increased Signature 3 (36). Somatic mutation analysis was  
348 restricted to 38 cases with detected Signature 3. Only one somatic pathogenic variant in *BRCA1*  
349 was detected in endometrioid cancer.  
350

351 **Discussion**

352 To understand the suitability of pre-clinical PDXs models to study EC, we undertook an in-  
353 depth genomic characterization of patient primary and matched serial PDX tumor samples of  
354 EC. Although some molecular typing of EC PDXs has been previously reported (e.g. those  
355 with microsatellite stability versus instability) (37, 38), this is the first report of *de novo*  
356 mutational signature and copy number analysis across a panel of EC PDXs. The established  
357 PDX models recapitulated key morphological and genomic features present in the molecular  
358 subtypes (3). Interestingly, no distinct PDX mutational signatures were found using *de novo*  
359 signature analysis, and the mutational profiles were very similar between the primary and  
360 matched PDX samples. We also did not observe an accumulation of PDX-specific CNA events,  
361 as was previously reported in PDX models of breast, brain, lung, colon and pancreatic  
362 cancers(39). Taken together, these results support that PDX-specific tumor evolution is  
363 minimal in these models, and they reliably represent the primary tumors. PDX engraftment  
364 was much higher in G3 tumors. For future studies, the addition of one dose of rituximab during  
365 implantation could reduce the incidence of lymphomas as previously reported in ovarian  
366 cancer(40).

367

368 *Intra-tumor heterogeneity*

369 EC tumors are composed of multiple complex sub-clonal cell populations resulting in intra-  
370 tumor heterogeneity(41, 42). Maximum tolerated dose chemotherapy regimens aim to  
371 eradicate the entire tumor but rarely achieve it, often leaving resistant sub-clones that possess  
372 a growth advantage and are free to expand. Hence, genomic intra-tumor heterogeneity has  
373 clinical implications for EC, and needs to be characterized to enable precision medicine. In this  
374 study we transplanted undisturbed tumor fragments and characterized multiple PDX lineages,

375 which allowed us to observe great variation in the intra-tumor heterogeneity among different  
376 PDX models.

377

378 In two of four models where multiple lineages were sequenced we detected high levels of intra-  
379 tumor heterogeneity that could have a potential impact on treatment responses. The greatest  
380 variability was observed between the different lineages (detected in early passages) and not  
381 between the passages, indicating that this heterogeneity was pre-existing in the primary tumor,  
382 although it is unclear whether the subclones were selected due to chance or a selective  
383 advantage in the PDX. In the MMR-deficient model (PDX58), one of the established lineages  
384 was enriched for a subclone with hotspot *KRAS* and *TP53* mutations and over 50% private  
385 mutations, suggesting that this subclone had diverged early on in the tumor evolution. *KRAS*  
386 mutations have been linked to drug resistance in multiple cancers (43, 44), and *TP53* mutations  
387 are associated with poor prognosis in EC (3). In the *TP53*-mutant UCS model (PDX03), one  
388 of the lineages had a WGD event together with other subclonal mutations. WGDs are  
389 frequently detected in UCS (90%) (10) compared with epithelial EC, as well as in metastatic  
390 cancers across multiple cancer types (45) and have been associated with poor prognosis (46).  
391 PDX models that capture pre-existing intra-tumor heterogeneity such as described here, make  
392 a perfect tool for studying the effects of individual genomic events on tumor evolution,  
393 progression and drug responses, and should be explored further.

394

#### 395 *PARP inhibitors in EC*

396 PARPi sensitivity has previously been reported in EC, although to date the work has been  
397 performed in cell lines, which do not faithfully represent all of the EC molecular subtypes (11,  
398 13). The proposed biomarkers of PARPi response in EC are diverse, including *PTEN*, *ARID1A*  
399 or *MRE11A* loss (11, 13, 14), *TP53* mutations, and cumulative effect of multiple somatic hits

400 in HR genes in hypermutated MMRd EC. Our PDX EC cohort had a representation of all of  
401 these events, so we could investigate their effect on PARPi response *in vivo*. By performing  
402 HRD scarring and mutational signature assessment, commonly used for classifying HRD-ness  
403 in ovarian and breast cancers (47), we determined that our EC models were all likely HR-  
404 proficient. Interestingly, three UCS models with mutated *TP53* had intermediate HRD scores  
405 and some of the somatic mutations were attributed to Signature 3, although it was not the  
406 dominant signature. Two of these UCS models also showed disease stabilization in response  
407 to the potent PARPi talazoparib *in vivo*. The PDX models of other molecular subtypes did not  
408 have a marked response to talazoparib (p53wt and MMRd with multiple damaging mutations  
409 in canonical HR genes, although none with consistent enrichment in tumors). Furthermore,  
410 mutations in *PTEN* or *ARID1A* did not have an effect on PARPi response in our models.

411

412 It has been recently reported that up to half of non-endometrioid EC (predominantly p53mut)  
413 can harbor BRCA-associated genomic scars compared with only 12% of endometrioid ECs  
414 (p53wt/MMRd) (16). Since our PDX cohort did not have a large representation of non-  
415 endometrioid EC (five of 11 models), it was possible that we missed the HRD cases by chance.  
416 However, our exploration of TCGA UCEC and UCS datasets also showed that HRD is likely  
417 rare in EC. We saw much lower rates of Signature 3 both in general (6.8%), and in the non-  
418 endometrioid cancers (12%) compared to the previous report (16). This was likely due to a  
419 more conservative signature assignment approach used in our study. The mutational signature  
420 analysis approach can have a great influence on the identification of signatures, especially  
421 signatures with flat profiles (Signature 3, 5 and 8) (48). Furthermore, the rates of damaging  
422 mutations in HR genes were quite rare (1.6-3.6% depending on the histological subtype),  
423 consistent with another study looking at bi-allelic alterations in HR genes (15).

424

425 The lack of tumor regressions in our EC PDX models in response to PARPi talazoparib and  
426 the infrequent HRD events in EC public datasets indicate that PARPi may not be sufficient as  
427 a single agent therapy in an unselected EC patient population. Nonetheless, PARPi may still  
428 have an important role to play in the management of EC, and should be further investigated in  
429 combination with other treatments. Several PARPis including talazoparib have been shown to  
430 have strong PARP trapping effect (33), leading to replication stalling. This opens up the  
431 possibility to combine PARPi with other therapies for an enhanced anti-tumor activity,  
432 including cell cycle checkpoint inhibition, RNA Pol1 inhibition (49) or ICIs. Genomically-  
433 characterized PDX models, such as ours, will be crucial for assessing the efficacy of these  
434 combinations in EC, as has already been assessed in other cancers (49, 50). Importantly though,  
435 PARPi and ICI combinations will need to be assessed in humanized PDX models, as regular  
436 PDX models lack representation of the immune landscape.

#### 437 **Conclusions**

438 In conclusion, we have shown that EC PDX models can capture intra-tumor heterogeneity,  
439 which should be accounted for and explored to improve treatment responses and patient  
440 outcomes. By combining genomic characterization and *in vivo* treatments, we also showed that  
441 PARPi talazoparib had disease stabilization activity in *TP53*-mutant EC, which can potentially  
442 be enhanced by combination therapies.

443

444 **List of Abbreviations**

- 445 CNA: Copy number alteration
- 446 EC: Endometrial cancer
- 447 FFPE: Formalin-fixed paraffin-embedded
- 448 H&E: Haematoxylin and eosin
- 449 HR: Homologous recombination
- 450 HRD: HR deficiency
- 451 ICI: Immune checkpoint inhibitor
- 452 LOH: Loss of heterozygosity
- 453 MMRd: Mismatch repair deficient
- 454 MSI: Microsatellite instability
- 455 NSG: Nod scid gamma
- 456 p53mut: TP53 mutant
- 457 p53wt: TP53 wildtype
- 458 PARPi: PARP inhibitor
- 459 PDX: patient-derived xenograft
- 460 RECIST: Response Evaluation Criteria In Solid Tumors
- 461 SV: Structural variant
- 462 TCGA: The Cancer Genome Atlas
- 463 TGI: tumor growth inhibition
- 464 TMB: Tumor mutation burden
- 465 UCEC: Uterine corpus endometrial carcinoma
- 466 UCS: Uterine carcinosarcoma
- 467 WES: Whole-exome sequencing
- 468 WGD: whole-genome duplication



469 WGS: Whole-genome sequencing

470

## 471 **Declarations**

### 472 *Ethics approval and consent to participate*

473 All samples were obtained from patients with informed consent and the study has human ethics  
474 approval from the Mater Health Services Human Research Ethics Committee  
475 (HREC/15/MHS/127), UnitingCare Health Human Research Ethics Committee (1116),  
476 Queensland University of Technology (1500000169, 1500000323) and QIMR Berghofer  
477 (P3478, P2095).

478 PDX establishment and passaging was performed according to animal ethics approvals at TRI  
479 (TRI/021/19) and QUT (1900000701). In vivo drug studies were performed according to  
480 animal ethics approvals at TRI and QUT (QUT/275/17 and 1700000755).

481

### 482 *Consent for publication*

483 Not applicable.

484

### 485 *Availability of data and materials*

486 The datasets (raw data files for WGS and WES) supporting the conclusions of this article are  
487 available in the European-Genome Phenome Archive under study number  
488 EGAS00001004666. Access to SNP array data can be requested by contacting the  
489 corresponding author.

490 The code required to reproduce the figures in this manuscript can be found on  
491 [https://github.com/okon/EC\\_PDX\\_genomics](https://github.com/okon/EC_PDX_genomics). The code used to perform alignment to human  
492 and mouse genome references is available on <https://github.com/ampatchlab/nf-pdx>. The in-  
493 house tools are available on <https://github.com/AdamaJava>.

494 *Competing interests*

495 OK has consulted for XING Technologies on development of diagnostic assays for HR  
496 deficiency. NW and JVP are co-founders and Board members of genomiQa. The other authors  
497 declare no competing financial interests.

498

499 *Funding*

500 We are very thankful for grant funding from Cancer Council Queensland (1030336), Cancer  
501 Australia (141222) and some bridging funding from the Institute of Health and Innovation,  
502 QUT as well as the School of Biomedical Sciences at QUT. ATS was supported by a QUTPRA  
503 scholarship. ALD and PR-M was supported by an Australian Government RTP Scholarship  
504 and a QIMR Berghofer Top Up Scholarship.

505

506 *Authors' contributions*

507 PP designed and supervised the study, provided study resources, managed the project,  
508 performed experiments and data analysis, and wrote the manuscript. NW and A-MP designed  
509 and supervised the study, managed the project and wrote the manuscript. VFB designed the  
510 study, developed the methodology, performed *in vivo* experiments and corresponding data  
511 analysis, and wrote the manuscript. OK developed the methodology, supervised and performed  
512 genomic data analysis, and wrote the manuscript. KN, LTK, SHK, ALD, PR-M, VL and FN  
513 performed genomic data analysis. ATS performed data curation, experiments and data analysis.  
514 LMP provided study resources, performed experiments and data analysis. RJ performed  
515 experiments and data analysis. DS performed histopathology data analysis. RR and CD  
516 provided study resources, curated data and managed the project administration. JN, AG, NC  
517 and LP provided study resources and curated data. JVP provided study resources and developed  
518 the methodology. All authors reviewed and approved the final manuscript.

519 *Acknowledgements*

520 Authors would like to thank all patients included in this study. We are also grateful for the staff  
521 at the Translational Research Institute of Australia (TRI) Biological Research Facility and TRI  
522 microscopy facility. The Translational Research Institute is supported by a grant (APP108382)  
523 from the Australian Government. We would also like to acknowledge members of the Medical  
524 Genomics and Genome Informatics teams at the QIMR Berghofer Medical Research for their  
525 technical support. The results shown here are in part based upon data generated by the TCGA  
526 Research Network: <https://www.cancer.gov/tcga>.

527

## 528 References

- 529 1. Siegel RL, Miller KD, Jemal A. Cancer statistics, 2018. *CA: a cancer journal for*  
530 *clinicians*. 2018;68(1):7-30.
- 531 2. Stelloo E, Nout RA, Osse EM, Jurgenliemk-Schulz IJ, Jobsen JJ, Lutgens LC, et al.  
532 Improved Risk Assessment by Integrating Molecular and Clinicopathological Factors in Early-  
533 stage Endometrial Cancer-Combined Analysis of the PORTEC Cohorts. *Clin Cancer Res*.  
534 2016;22(16):4215-24.
- 535 3. Levine DA, Network CGAR. Integrated genomic characterization of endometrial  
536 carcinoma. *Nature*. 2013;497(7447):67-73.
- 537 4. Talhouk A, McConechy M, Leung S, Li-Chang H, Kwon J, Melnyk N, et al. A  
538 clinically applicable molecular-based classification for endometrial cancers. *British journal of*  
539 *cancer*. 2015;113(2):299-310.
- 540 5. Talhouk A, McConechy MK, Leung S, Yang W, Lum A, Senz J, et al. Confirmation of  
541 ProMisE: a simple, genomics-based clinical classifier for endometrial cancer. *Cancer*.  
542 2017;123(5):802-13.
- 543 6. Kommoss S, McConechy M, Kommoss F, Leung S, Bunz A, Magrill J, et al. Final  
544 validation of the ProMisE molecular classifier for endometrial carcinoma in a large population-  
545 based case series. *Annals of Oncology*. 2018;29(5):1180-8.
- 546 7. Cosgrove CM, Trichtler DL, Cohn DE, Mutch DG, Rush CM, Lankes HA, et al. An  
547 NRG Oncology/GOG study of molecular classification for risk prediction in endometrioid  
548 endometrial cancer. *Gynecologic oncology*. 2018;148(1):174-80.
- 549 8. Jones S, Stransky N, McCord CL, Cerami E, Lagowski J, Kelly D, et al. Genomic  
550 analyses of gynaecologic carcinosarcomas reveal frequent mutations in chromatin remodelling  
551 genes. *Nature communications*. 2014;5(1):1-7.
- 552 9. Zhao S, Bellone S, Lopez S, Thakral D, Schwab C, English DP, et al. Mutational  
553 landscape of uterine and ovarian carcinosarcomas implicates histone genes in epithelial-  
554 mesenchymal transition. *Proceedings of the National Academy of Sciences*.  
555 2016;113(43):12238-43.
- 556 10. Cherniack AD, Shen H, Walter V, Stewart C, Murray BA, Bowlby R, et al. Integrated  
557 molecular characterization of uterine carcinosarcoma. *Cancer cell*. 2017;31(3):411-23.
- 558 11. Dedes KJ, Wetterskog D, Mendes-Pereira AM, Natrajan R, Lambros MB, Geyer FC,  
559 et al. PTEN deficiency in endometrioid endometrial adenocarcinomas predicts sensitivity to  
560 PARP inhibitors. *Science translational medicine*. 2010;2(53):53ra75-53ra75.
- 561 12. Miyasaka A, Oda K, Ikeda Y, Wada-Hiraike O, Kashiyama T, Enomoto A, et al. Anti-  
562 tumor activity of olaparib, a poly (ADP-ribose) polymerase (PARP) inhibitor, in cultured  
563 endometrial carcinoma cells. *BMC cancer*. 2014;14(1):179.
- 564 13. Koppensteiner R, Samartzis EP, Noske A, von Teichman A, Dedes I, Gwerder M, et  
565 al. Effect of MRE11 loss on PARP-inhibitor sensitivity in endometrial cancer in vitro. *PLoS*  
566 *one*. 2014;9(6):e100041.
- 567 14. Shen J, Peng Y, Wei L, Zhang W, Yang L, Lan L, et al. ARID1A deficiency impairs  
568 the DNA damage checkpoint and sensitizes cells to PARP inhibitors. *Cancer discovery*.  
569 2015;5(7):752-67.
- 570 15. Riaz N, Bleuca P, Lim RS, Shen R, Higginson DS, Weinhold N, et al. Pan-cancer  
571 analysis of bi-allelic alterations in homologous recombination DNA repair genes. *Nature*  
572 *communications*. 2017;8(1):857.
- 573 16. de Jonge MM, Auguste A, van Wijk LM, Schouten PC, Meijers M, ter Haar NT, et al.  
574 Frequent homologous recombination deficiency in high-grade endometrial carcinomas.  
575 *Clinical Cancer Research*. 2019;25(3):1087-97.

- 576 17. Shen Y, Rehman FL, Feng Y, Boshuizen J, Bajrami I, Elliott R, et al. BMN 673, a novel  
577 and highly potent PARP1/2 inhibitor for the treatment of human cancers with DNA repair  
578 deficiency. *Clinical Cancer Research*. 2013;19(18):5003-15.
- 579 18. Song S, Nones K, Miller D, Harliwong I, Kassahn KS, Pinese M, et al. qpure: A tool  
580 to estimate tumor cellularity from genome-wide single-nucleotide polymorphism profiles. *PloS*  
581 *one*. 2012;7(9):e45835.
- 582 19. Martin M. Cutadapt removes adapter sequences from high-throughput sequencing  
583 reads. *EMBnet journal*. 2011;17(1):10-2.
- 584 20. Li H. Aligning sequence reads, clone sequences and assembly contigs with BWA-  
585 MEM. *arXiv preprint arXiv:13033997*. 2013.
- 586 21. Li H, Handsaker B, Wysoker A, Fennell T, Ruan J, Homer N, et al. The Sequence  
587 Alignment/Map format and SAMtools. *Bioinformatics*. 2009;25(16):2078-9.
- 588 22. Patch AM, Christie EL, Etemadmoghadam D, Garsed DW, George J, Fereday S, et al.  
589 Whole-genome characterization of chemoresistant ovarian cancer. *Nature*.  
590 2015;521(7553):489-94.
- 591 23. Raine KM, Van Loo P, Wedge DC, Jones D, Menzies A, Butler AP, et al. ascatNgs:  
592 Identifying Somatically Acquired Copy-Number Alterations from Whole-Genome Sequencing  
593 Data. *Current protocols in bioinformatics*. 2016;56(1):15.9. 1-9. 7.
- 594 24. Popova T, Manié E, Stoppa-Lyonnet D, Rigail G, Barillot E, Stern MH. Genome  
595 Alteration Print (GAP): a tool to visualize and mine complex cancer genomic profiles obtained  
596 by SNP arrays. *Genome biology*. 2009;10(11):1-14.
- 597 25. Roth A, Khattra J, Yap D, Wan A, Laks E, Biele J, et al. PyClone: statistical inference  
598 of clonal population structure in cancer. *Nature methods*. 2014;11(4):396-8.
- 599 26. Dang H, White B, Foltz S, Miller C, Luo J, Fields R, et al. ClonEvol: clonal ordering  
600 and visualization in cancer sequencing. *Annals of oncology*. 2017;28(12):3076-82.
- 601 27. Niu B, Ye K, Zhang Q, Lu C, Xie M, McLellan MD, et al. MSIsensor: microsatellite  
602 instability detection using paired tumor-normal sequence data. *Bioinformatics*.  
603 2014;30(7):1015-6.
- 604 28. Sztupinszki Z, Diossy M, Krzystanek M, Reiniger L, Csabai I, Favero F, et al.  
605 Migrating the SNP array-based homologous recombination deficiency measures to next  
606 generation sequencing data of breast cancer. *NPJ breast cancer*. 2018;4(1):1-4.
- 607 29. Nik-Zainal S, Davies H, Staaf J, Ramakrishna M, Glodzik D, Zou X, et al. Landscape  
608 of somatic mutations in 560 breast cancer whole-genome sequences. *Nature*.  
609 2016;534(7605):47.
- 610 30. Newell F, Kong Y, Wilmott JS, Johansson PA, Ferguson PM, Cui C, et al. Whole-  
611 genome landscape of mucosal melanoma reveals diverse drivers and therapeutic targets. *Nature*  
612 *communications*. 2019;10(1):1-15.
- 613 31. Kane DP, Shcherbakova PV. A common cancer-associated DNA polymerase epsilon  
614 mutation causes an exceptionally strong mutator phenotype, indicating fidelity defects distinct  
615 from loss of proofreading. *Cancer Res*. 2014;74(7):1895-901.
- 616 32. Kahn RM, Gordhandas S, Maddy BP, Baltich Nelson B, Askin G, Christos PJ, et al.  
617 Universal endometrial cancer tumor typing: How much has immunohistochemistry,  
618 microsatellite instability, and MLH1 methylation improved the diagnosis of Lynch syndrome  
619 across the population? *Cancer*. 2019;125(18):3172-83.
- 620 33. Murai J, Huang SY, Renaud A, Zhang Y, Ji J, Takeda S, et al. Stereospecific PARP  
621 trapping by BMN 673 and comparison with olaparib and rucaparib. *Mol Cancer Ther*.  
622 2014;13(2):433-43.
- 623 34. Mills GB, Timms KM, Reid JE, Gutin A, Krivak TC, Hennessy B, et al. Homologous  
624 recombination deficiency score shows superior association with outcome compared with its

- 625 individual score components in platinum-treated serous ovarian cancer. *Gynecologic*  
626 *Oncology*. 2016;141:2-3.
- 627 35. Telli ML, Timms KM, Reid J, Hennessy B, Mills GB, Jensen KC, et al. Homologous  
628 recombination deficiency (HRD) score predicts response to platinum-containing neoadjuvant  
629 chemotherapy in patients with triple-negative breast cancer. *Clinical cancer research*.  
630 2016;22(15):3764-73.
- 631 36. Polak P, Kim J, Braunstein LZ, Karlic R, Haradhavala NJ, Tiao G, et al. A mutational  
632 signature reveals alterations underlying deficient homologous recombination repair in breast  
633 cancer. *Nature genetics*. 2017.
- 634 37. Depreeuw J, Hermans E, Schrauwen S, Annibali D, Coenegrachts L, Thomas D, et al.  
635 Characterization of patient-derived tumor xenograft models of endometrial cancer for  
636 preclinical evaluation of targeted therapies. *Gynecologic oncology*. 2015;139(1):118-26.
- 637 38. Cuppens T, Depreeuw J, Annibali D, Thomas D, Hermans E, Gommé E, et al.  
638 Establishment and characterization of uterine sarcoma and carcinosarcoma patient-derived  
639 xenograft models. *Gynecologic Oncology*. 2017;146(3):538-45.
- 640 39. Ben-David U, Ha G, Tseng Y-Y, Greenwald NF, Oh C, Shih J, et al. Patient-derived  
641 xenografts undergo mouse-specific tumor evolution. *Nature genetics*. 2017;49(11):1567.
- 642 40. Butler KA, Hou X, Becker MA, Zanfagnin V, Enderica-Gonzalez S, Visscher D, et al.  
643 Prevention of human lymphoproliferative tumor formation in ovarian cancer patient-derived  
644 xenografts. *Neoplasia*. 2017;19(8):628-36.
- 645 41. Gibson WJ, Hoivik EA, Halle MK, Taylor-Weiner A, Cherniack AD, Berg A, et al.  
646 The genomic landscape and evolution of endometrial carcinoma progression and  
647 abdominopelvic metastasis. *Nature genetics*. 2016;48(8):848-55.
- 648 42. de la Vega LL, Samaha MC, Hu K, Bick NR, Siddiqui J, Hovelson DH, et al.  
649 Multiclinality and marked branched evolution of low-grade endometrioid endometrial  
650 carcinoma. *Molecular Cancer Research*. 2019;17(3):731-40.
- 651 43. Misale S, Yaeger R, Hobor S, Scala E, Janakiraman M, Liska D, et al. Emergence of  
652 KRAS mutations and acquired resistance to anti-EGFR therapy in colorectal cancer. *Nature*.  
653 2012;486(7404):532-6.
- 654 44. Pao W, Wang TY, Riely GJ, Miller VA, Pan Q, Ladanyi M, et al. KRAS mutations and  
655 primary resistance of lung adenocarcinomas to gefitinib or erlotinib. *PLoS medicine*.  
656 2005;2(1):e17.
- 657 45. Priestley P, Baber J, Lolkema MP, Steeghs N, de Bruijn E, Shale C, et al. Pan-cancer  
658 whole-genome analyses of metastatic solid tumours. *Nature*. 2019:1-7.
- 659 46. Bielski CM, Zehir A, Penson AV, Donoghue MT, Chatila W, Armenia J, et al. Genome  
660 doubling shapes the evolution and prognosis of advanced cancers. *Nature genetics*.  
661 2018;50(8):1189-95.
- 662 47. Nones K, Johnson J, Newell F, Patch A, Thorne H, Kazakoff S, et al. Whole-genome  
663 sequencing reveals clinically relevant insights into the aetiology of familial breast cancers.  
664 *Annals of Oncology*. 2019;30(7):1071-9.
- 665 48. Maura F, Degasperi A, Nadeu F, Leongamornlert D, Davies H, Moore L, et al. A  
666 practical guide for mutational signature analysis in hematological malignancies. *Nature*  
667 *communications*. 2019;10(1):1-12.
- 668 49. Sanij E, Hannan KM, Xuan J, Yan S, Ahern JE, Trigos AS, et al. CX-5461 activates  
669 the DNA damage response and demonstrates therapeutic efficacy in high-grade serous ovarian  
670 cancer. *Nature communications*. 2020;11(1):1-18.
- 671 50. Shen J, Zhao W, Ju Z, Wang L, Peng Y, Labrie M, et al. PARPi triggers the STING-  
672 dependent immune response and enhances the therapeutic efficacy of immune checkpoint  
673 blockade independent of BRCAness. *Cancer research*. 2019;79(2):311-9.
- 674

675 **Figure Legends**

676 **Fig. 1. Histopathology assessment of the primary and PDX tumor samples.** PR: primary  
677 tumor. PDX-F0: 1<sup>st</sup> tumor obtained from the mice transplant. PDX-F1, PDX-F2: subsequent  
678 transplants. F0 picture for PDX12 is missing as no FFPE sample was available for this lineage.

679

680 **Fig. 2. The four molecular subtypes are represented in PDX models.** Genomic  
681 characteristics of endometrial carcinoma and carcinosarcoma PDX models. PDX models are  
682 grouped by the four molecular subtypes: POLE, p53wt, MMRd and p53mut. Tumour mutation  
683 burden is shown by grey bars, as mutations per Mb. Somatic mutations and CNA events, which  
684 were detected in PDX samples in genes relevant to endometrial carcinomas and  
685 carcinosarcomas (Additional File 1:Table S3, Additional File 2:Table S4), are shown. Only  
686 consensus variants detected in all sequenced PDX tumor samples were included in this figure.  
687 MSI score was assessed by MSISensor (Additional File 1:Fig. S1). Percentage of genome with  
688 CNA and the number of CNA segments were determined from SNP arrays or WGS data  
689 (Additional File 1:Fig. S2). Only the dominant mutational signature etiology is shown.

690

691 **Fig. 3. Intra-tumor heterogeneity observed in the MMRd EC PDX models.** **a** Genome-  
692 wide levels of CNA and **b** total somatic mutation count in the four MMRd models, where  
693 primary tumor sample was analyzed by WES and by SNP arrays. Varying degrees of  
694 mutational heterogeneity visualized by Euler diagrams of somatic substitutions called by  
695 qBasepileup in **c** PDX59 and **d** PDX58 MMRd models. **e** Cellular prevalence and **f** the clonal  
696 evolution tree of the top three mutational clusters (with  $\geq 5\%$  of all somatic substitutions)  
697 detected in the PDX58 model by PyClone. Values shown above boxplots represent the number  
698 of substitutions contributing to each cluster. Length of branches is proportional to the number  
699 of substitutions attributed to that clone. Tumor samples are grouped by patient ID. PDX



700 samples are labelled by passage number and lineage in brackets. DEL — deletion; DNP —  
701 double nucleotide polymorphism; INS — insertion; SNP — single nucleotide polymorphism;  
702 Hom Del — homozygous deletion.

703

704 **Fig. 4. Intra-tumor heterogeneity and clonal evolution observed in p53mut UCS PDX**  
705 **models. a** Genome-wide levels of CNA and **b** total somatic mutation count in the three UCS  
706 models. **c** Cellular prevalence of the top five mutational clusters with  $\geq 5\%$  of all somatic  
707 substitutions detected in the PDX03 model by PyClone. Values shown above boxplots  
708 represent the number of substitutions contributing to each cluster. **d** Fish plots and **e** cellular  
709 population depictions of the top five mutational clusters detected in the PDX03 carcinosarcoma  
710 model. Percentages shown in the fish plots are the estimated proportions of cells containing  
711 that mutational cluster. **f** The clonal evolution tree inferred by ClonEvol, where length of  
712 branches is proportional to the number of substitutions attributed to that clone. TNP — triple  
713 nucleotide polymorphism.

714

715 **Fig. 5. Talazoparib responses in EC and UCS PDX models.** Talazoparib responses in **a**  
716 PDX03 — p53mut UCS; **b** PDX49 — p53mut UCS; **c** PDX56 — p53 UCS with somatic  
717 *ARID1A* deletion; **d** PDX23 — p53wt EC; **e** PDX12 — MMRd EC with somatic *PTEN*,  
718 *BRCA2*, *ATM* and *PALB2* mutations; **f** PDX53 — MMRd EC with somatic *PTEN*, *ATM*,  
719 *BRCA1* and *MRE11A* mutations. Recipient mice bearing PDX at starting volume of  $\sim 150$ - $350$   
720  $\text{mm}^3$  were randomized to treatment with vehicle or talazoparib (0.33mg/kg) for 28 days (6 days  
721 on, one day off) via oral gavage. Analysis for significance between treatment groups was  
722 performed using a repeated mixed effects analysis (which can account for random missing  
723 measurements) on the day the first mouse was sacrificed based on tumor size (e.g. 17, 22 and



724 24 days), except for PDX53 where 2 vehicle mice were sacrificed early and excluded. n.s —  
725 not significant; \* — significant difference (p-value shown).

726

727 **Fig. 6. Genomic HRD assessment in EC PDX models and public data. a** HRD assessment  
728 in PDX models. Somatic substitutions, indels, CNAs and SVs are shown for DNA repair  
729 related genes, including *PTEN* and *ARID1A* (Additional File 1:Table S5, Additional File  
730 2:Table S6). HR-related genes are highlighted in bold. No pathogenic or likely pathogenic  
731 germline substitution and indel variants in these genes were detected. HRD sum scores were  
732 determined using scarHRD from SNP arrays and WGS data, where available. Percentage of  
733 Signature 3 was determined with deconstructSigs using COSMIC v2 signatures. Only WGS  
734 data is shown for PDX03 and PDX49, where WES and WGS was performed. **b** Mutational  
735 signature assignment for TCGA-UCEC and TCGA-UCS cohorts (n=591). Signature  
736 assignment was performed using deconstructSigs with 15% minimum signature cut-off. **c**  
737 TCGA-UCEC and TCGA-UCS cases with possible HRD. Cases with pathogenic or likely  
738 pathogenic variants in HR-related genes (Additional File 1:Table S5, Additional File 2:Table  
739 S7) or cases with Signature 3 detected are included.

740

741

742 **Additional files**

743 **Additional File 1:** pdf; Supplementary Methods, Supplementary Tables 1-3,5 and  
744 Supplementary Figures.

745 **Additional File 2:** xlsx; Supplementary Tables 4,6-8 (descriptions provided in the file).



**Figure 1**  
Bonazzi et al.

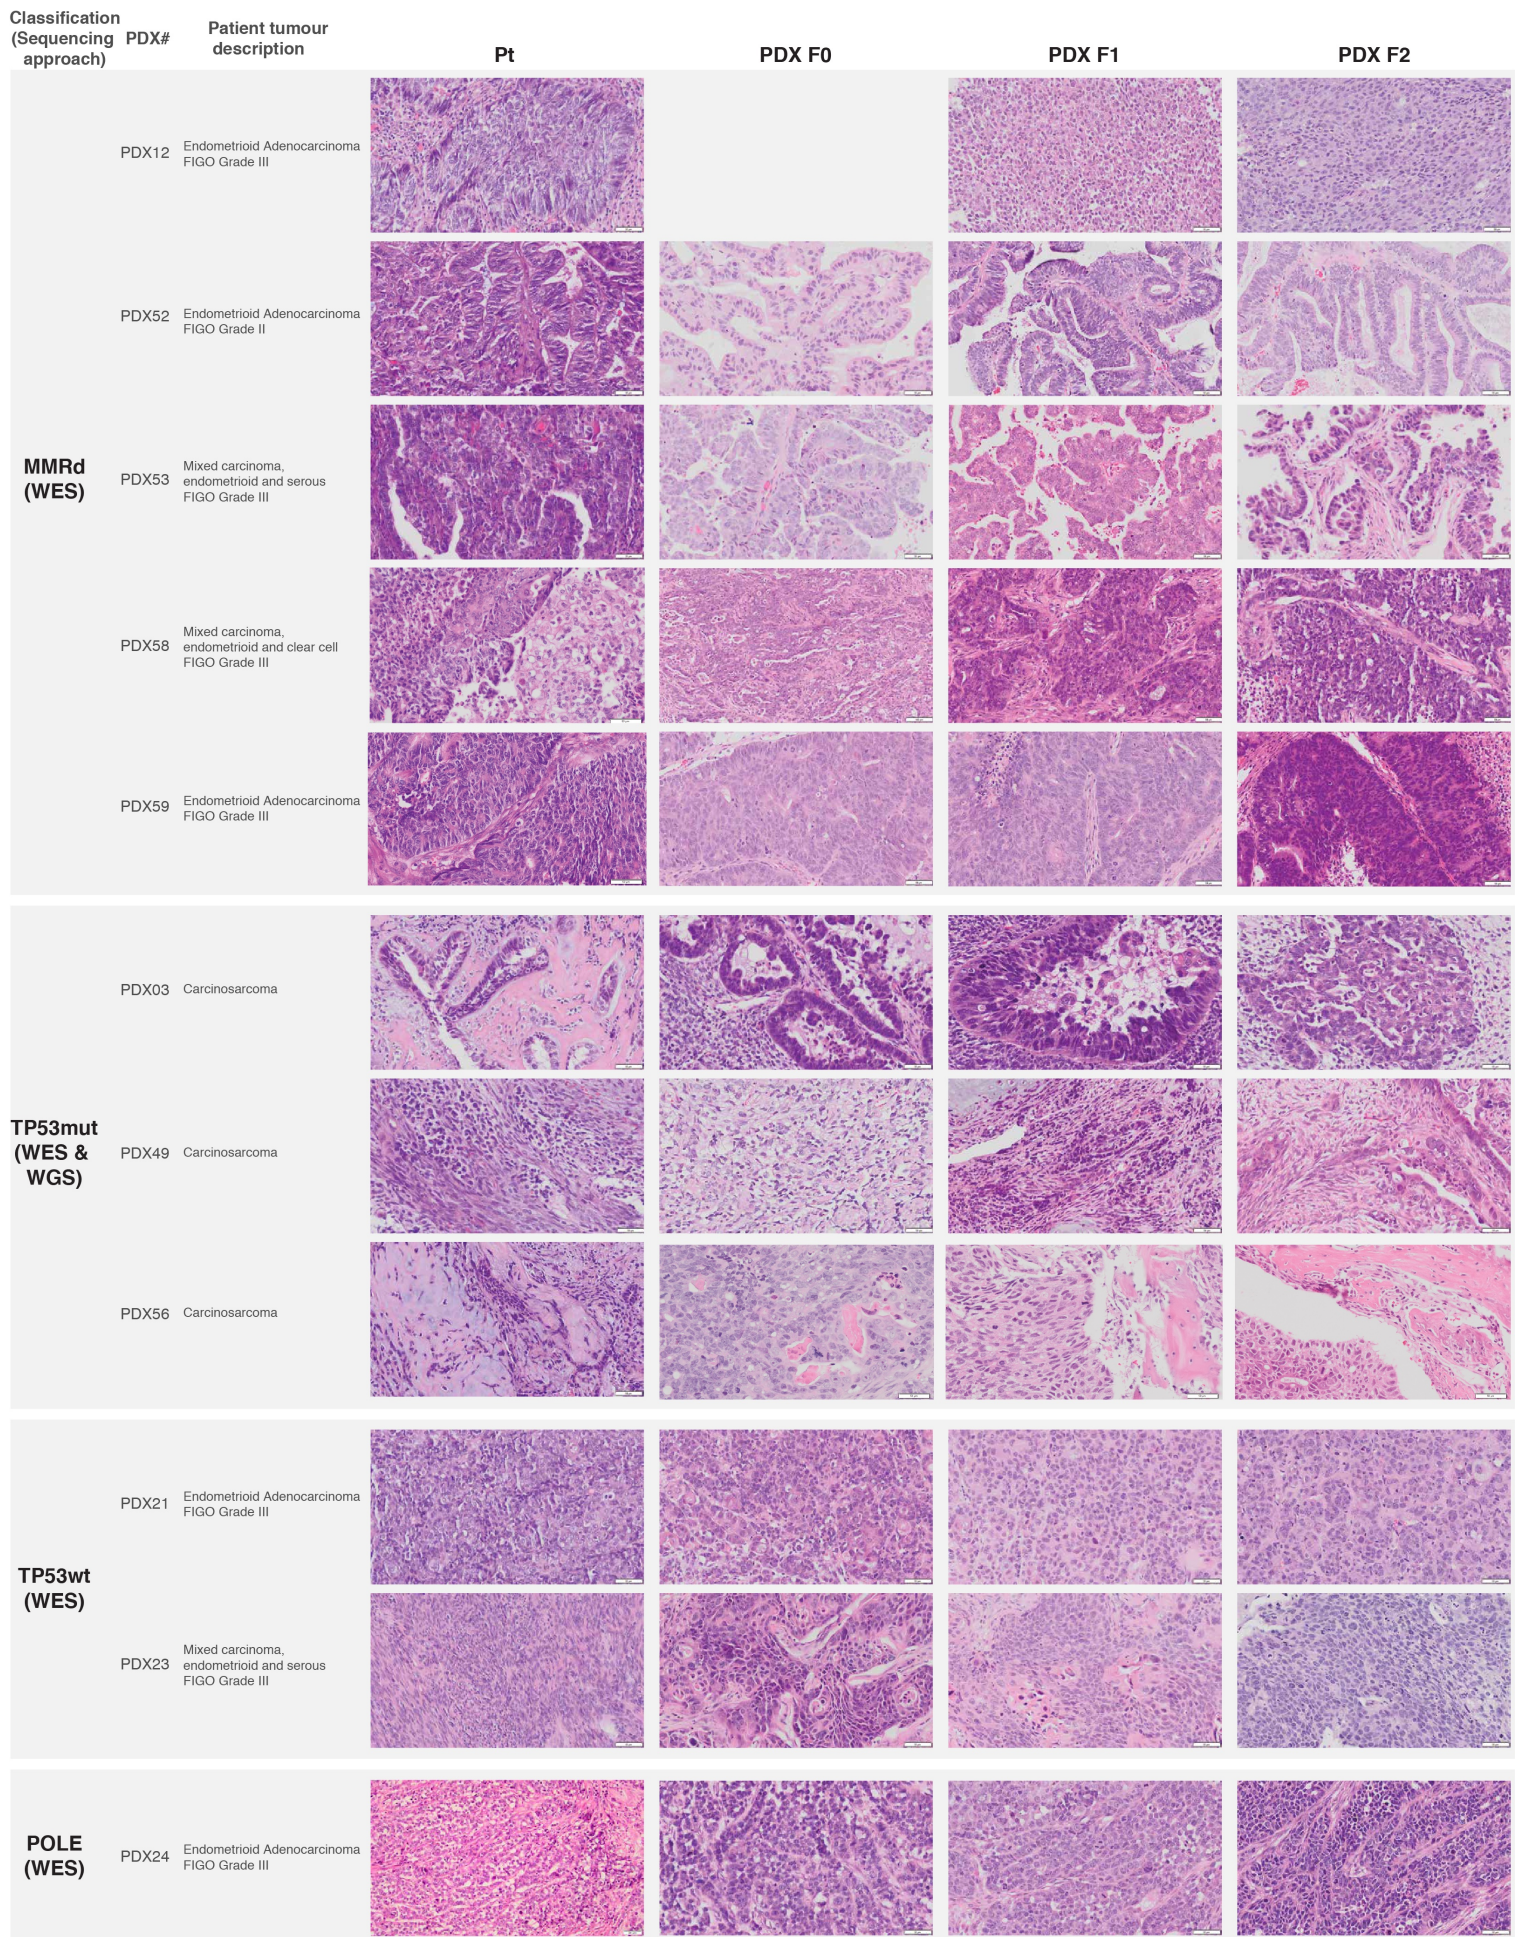



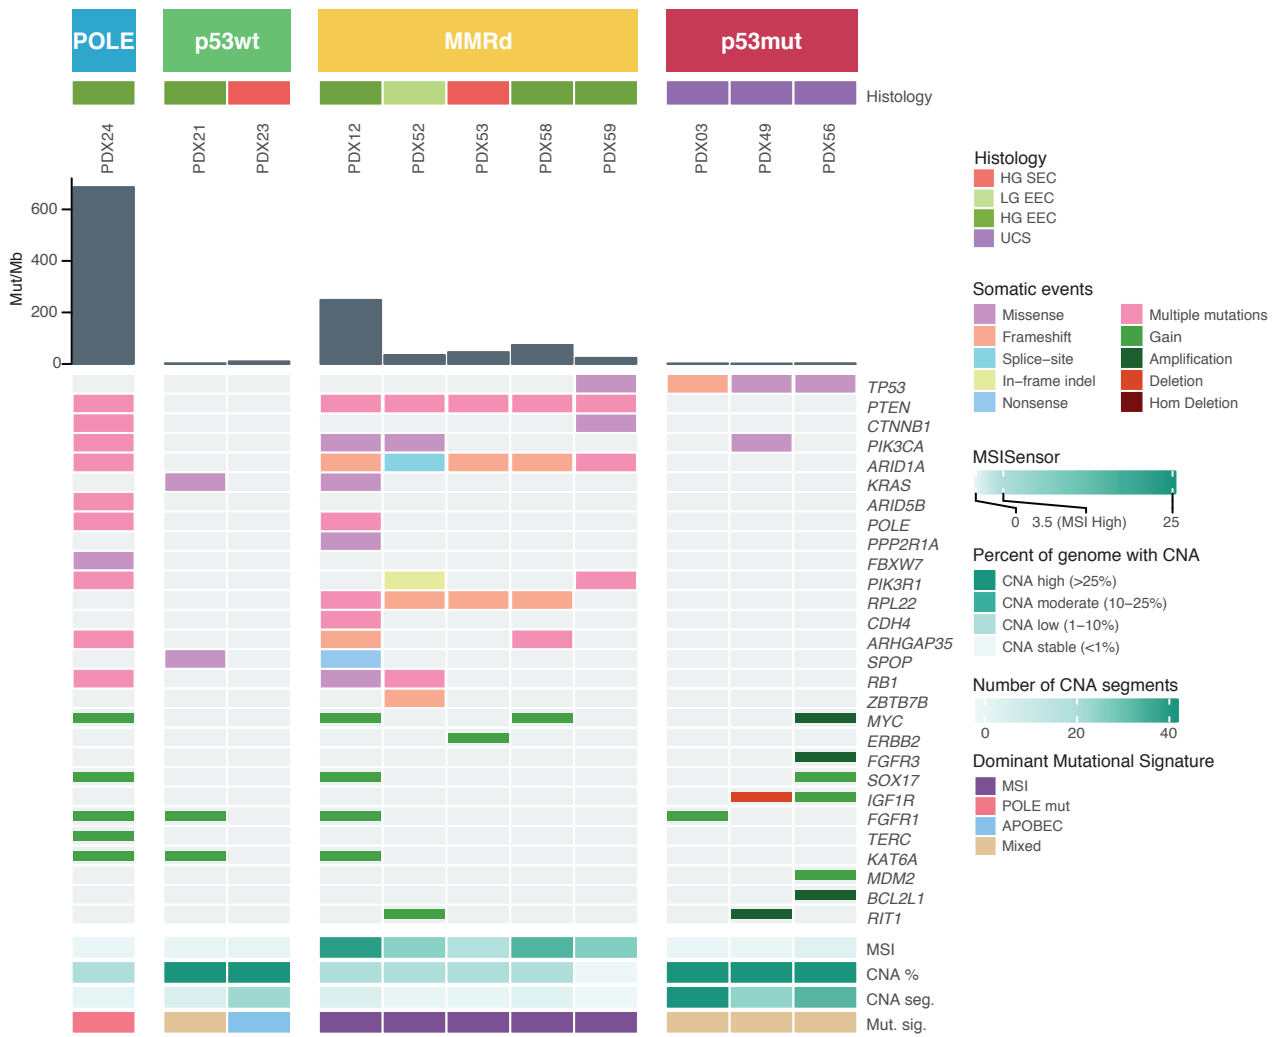

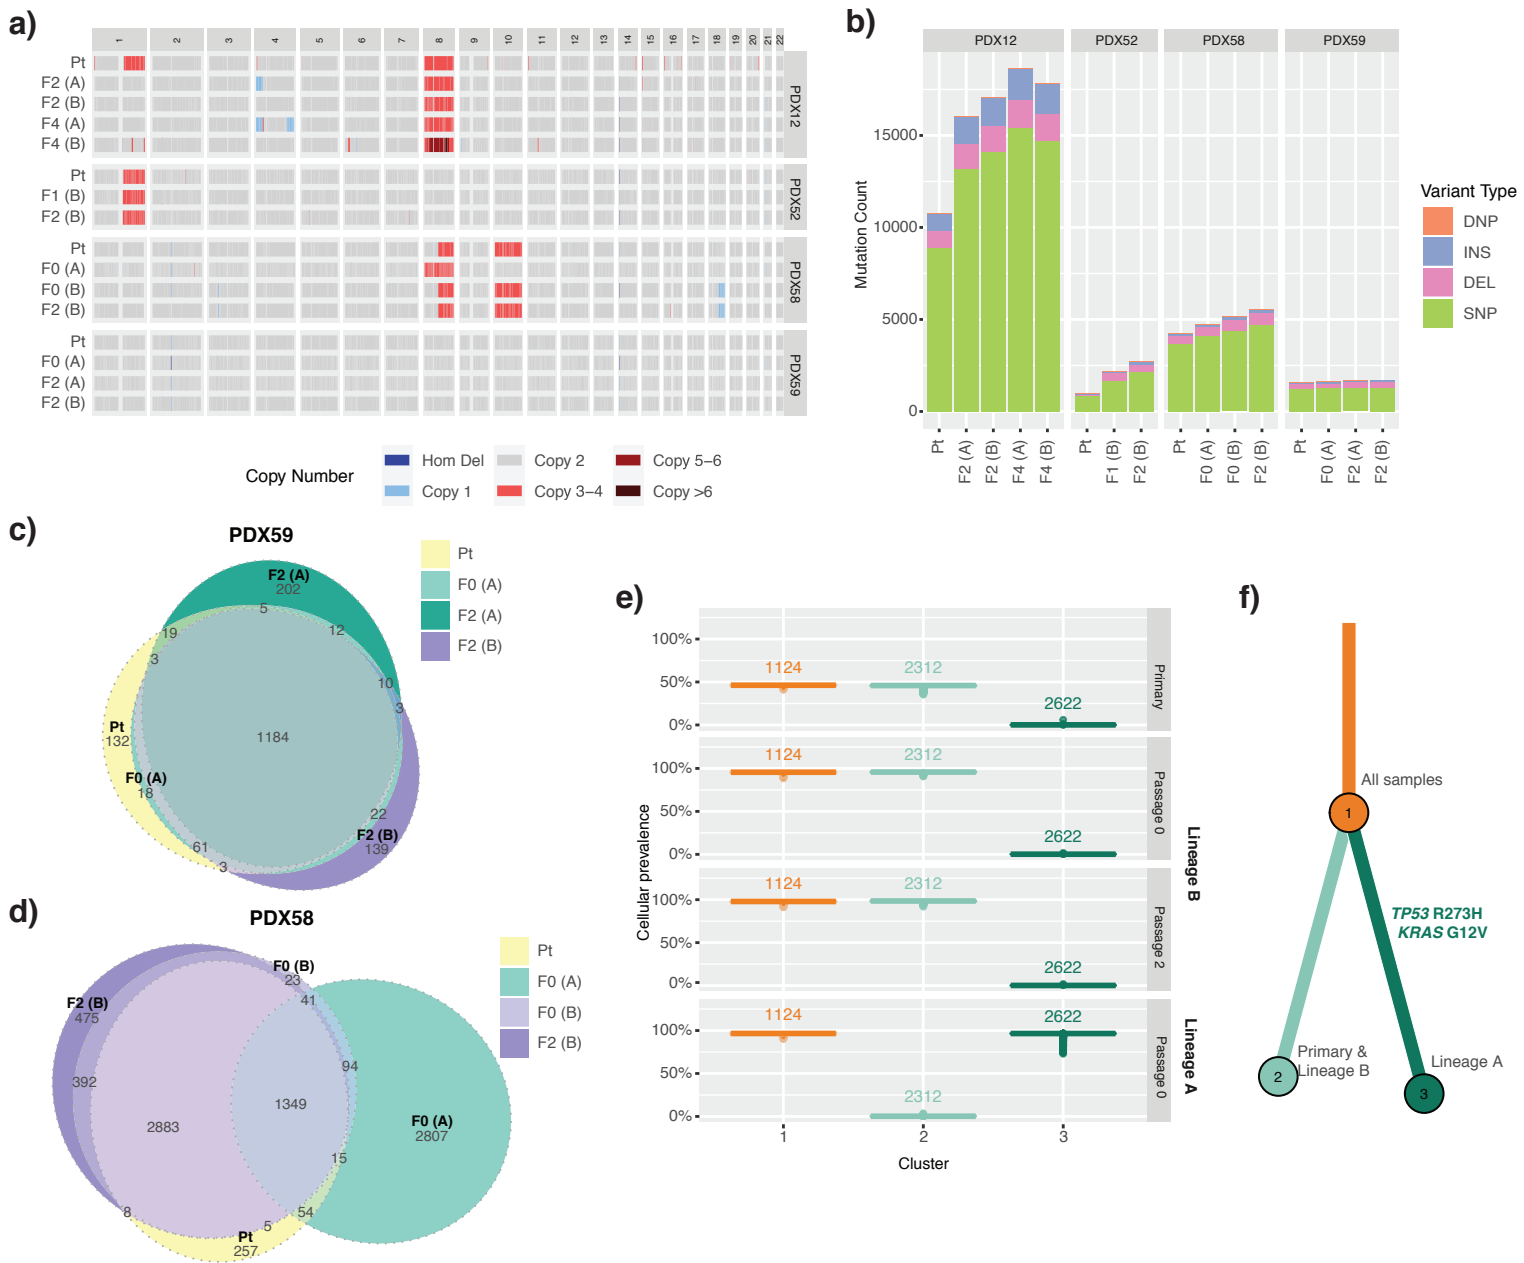

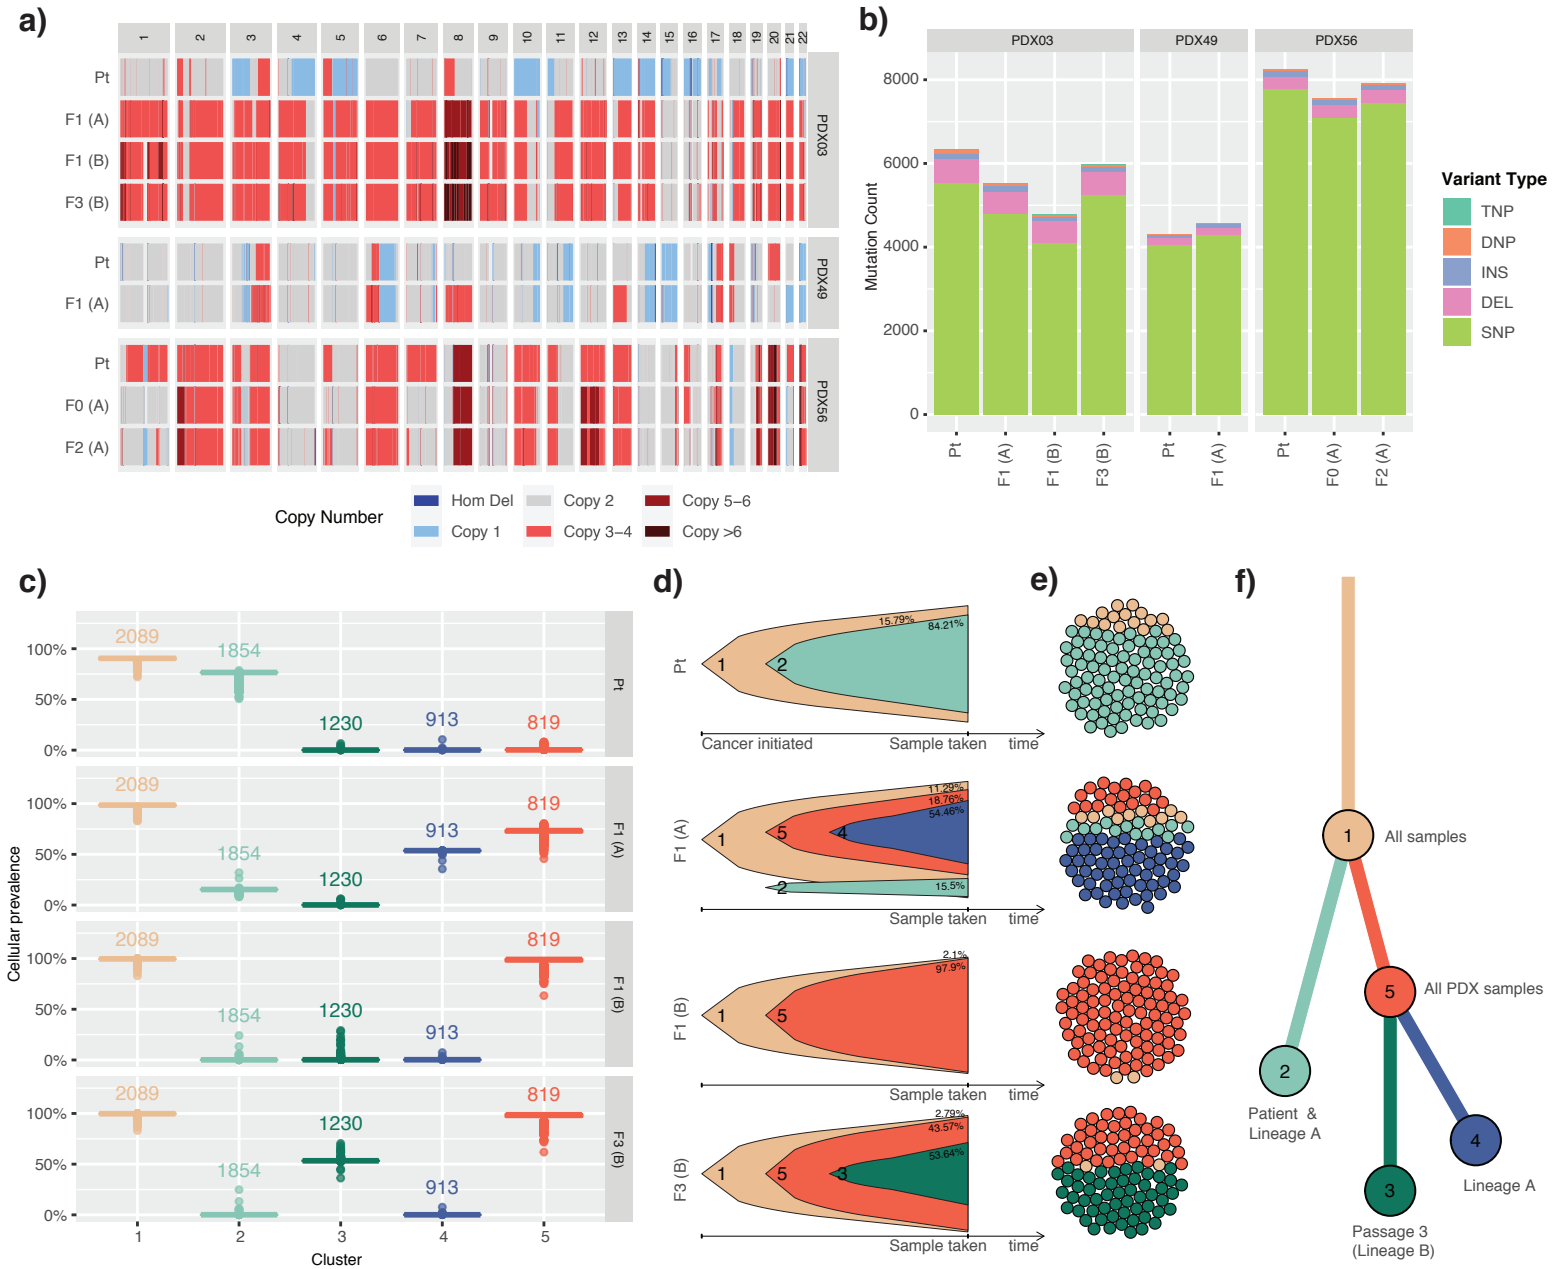

Vehicle Average Vehicle  
Talazoparib Average Talazoparib

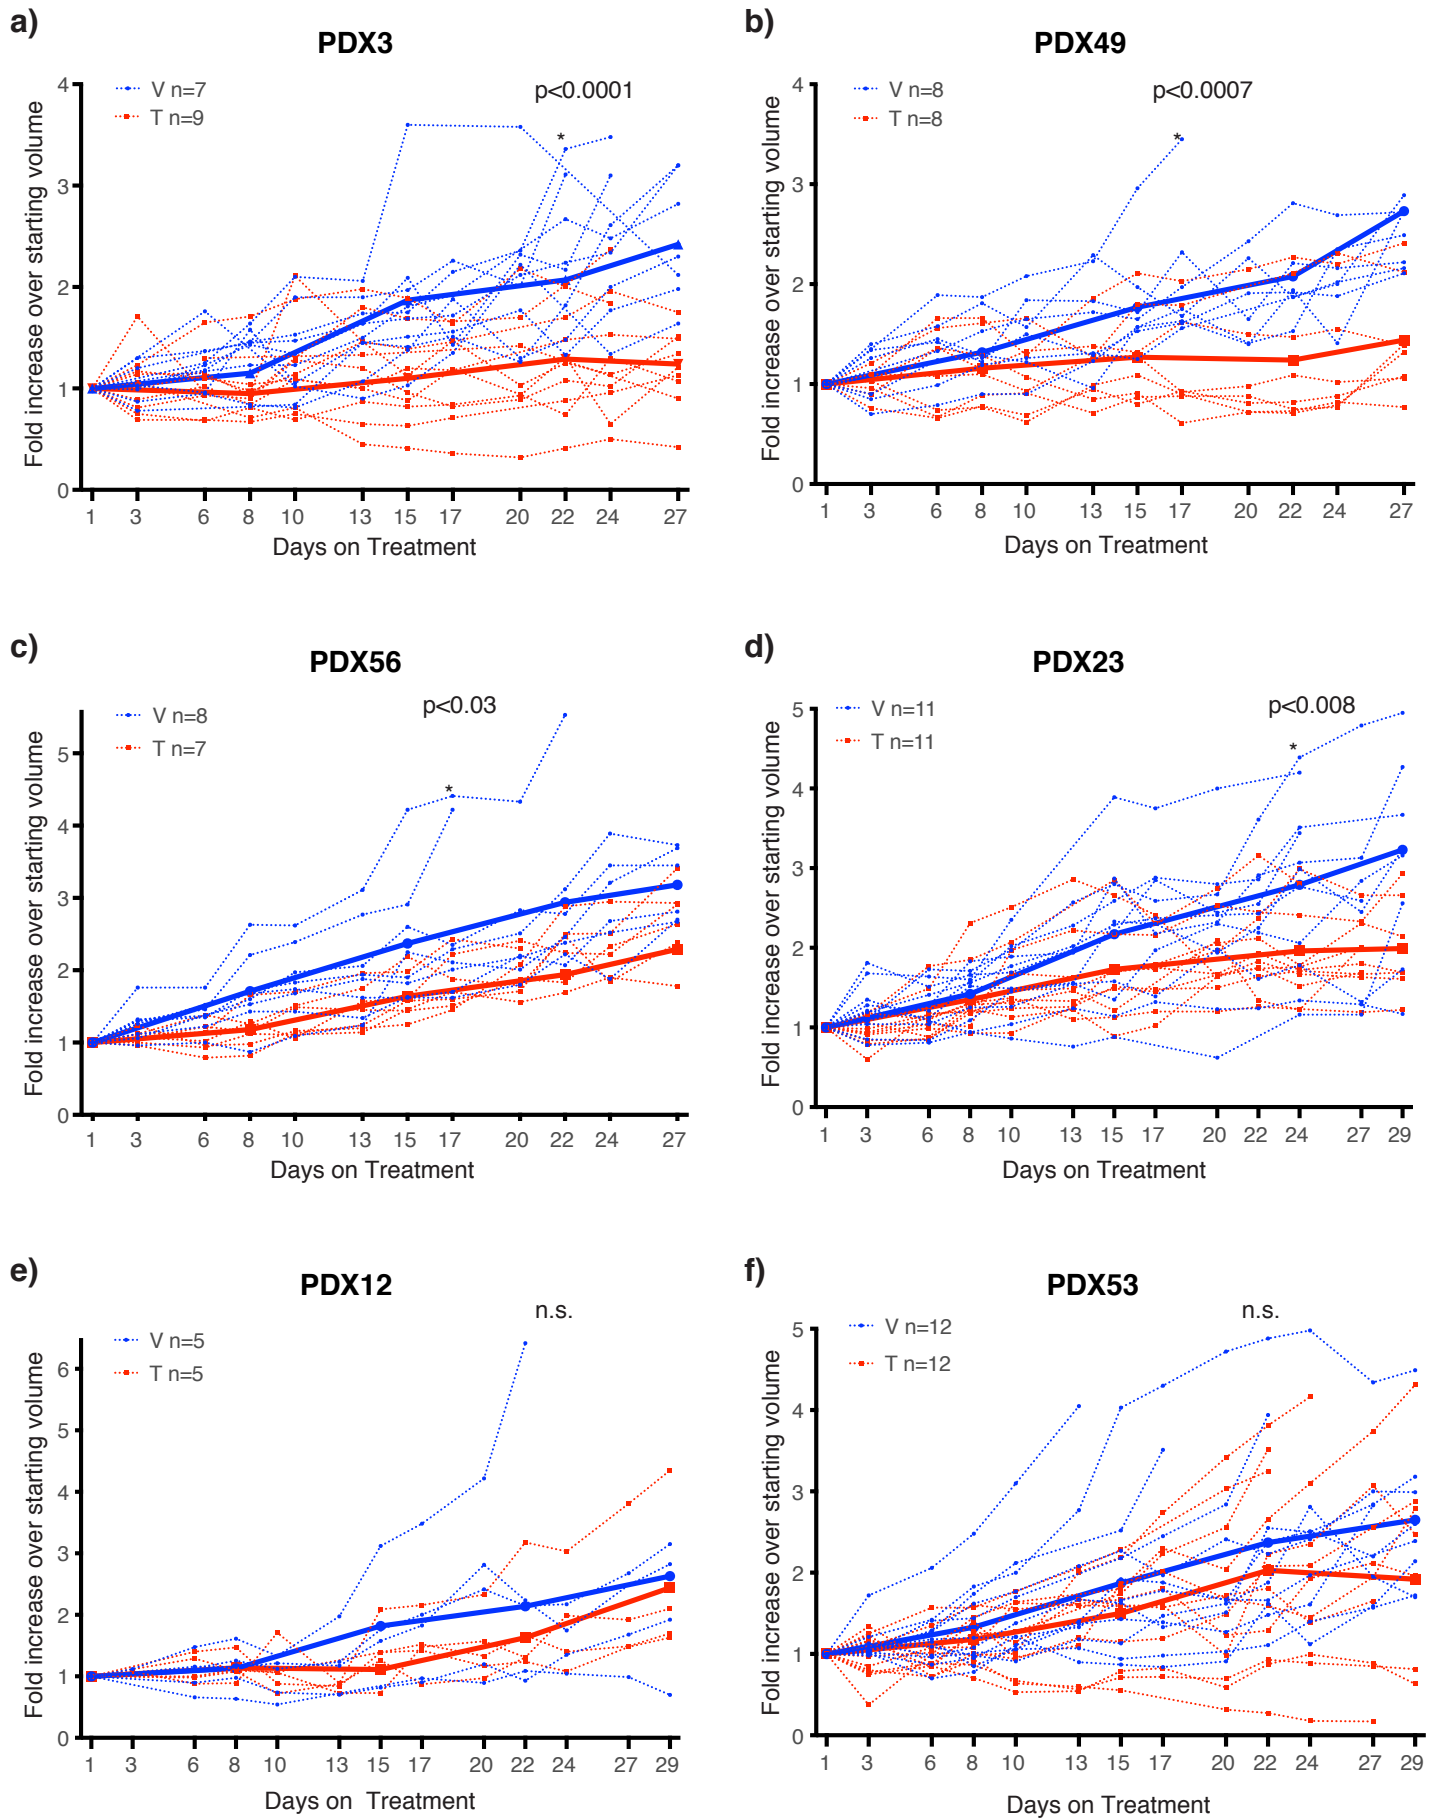

a)

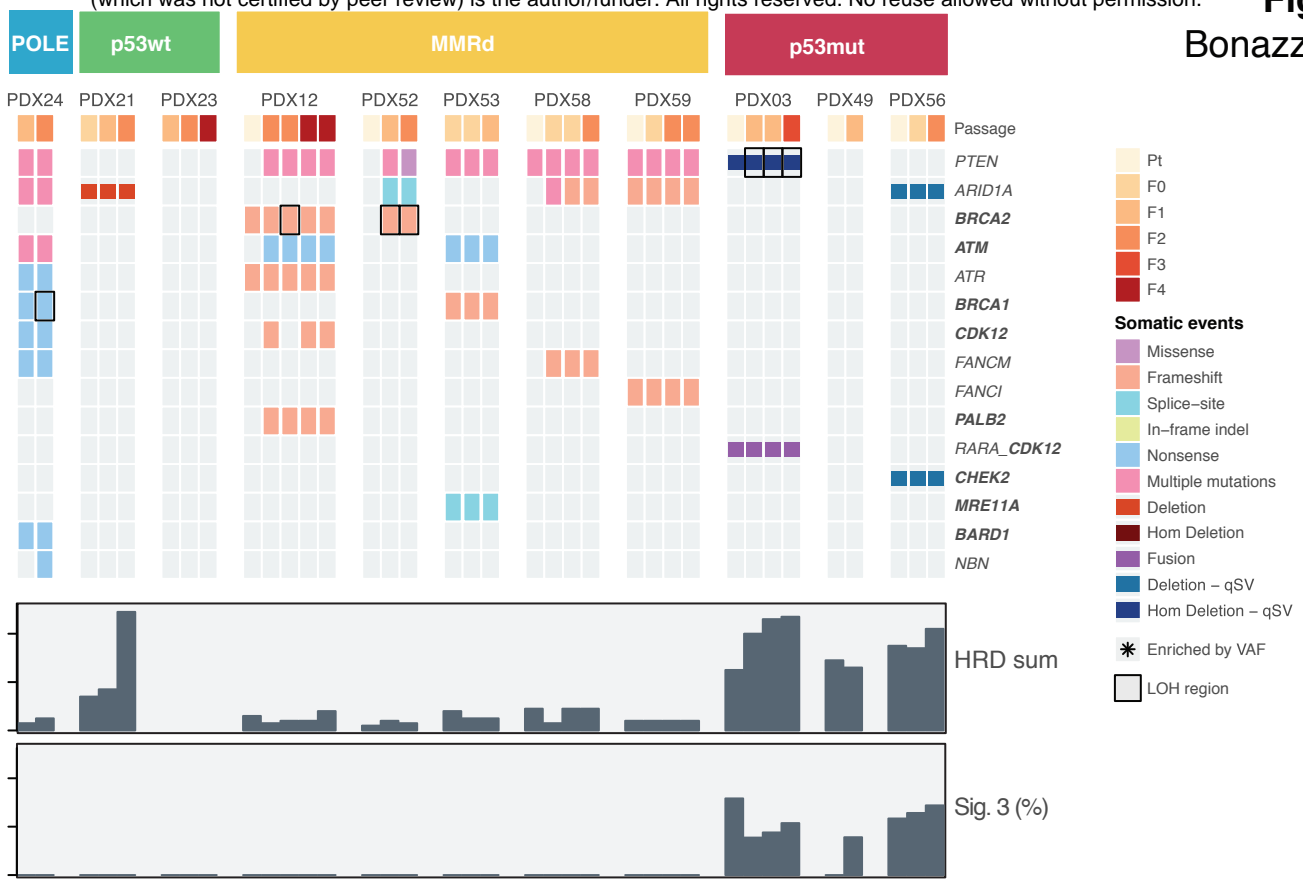

b)

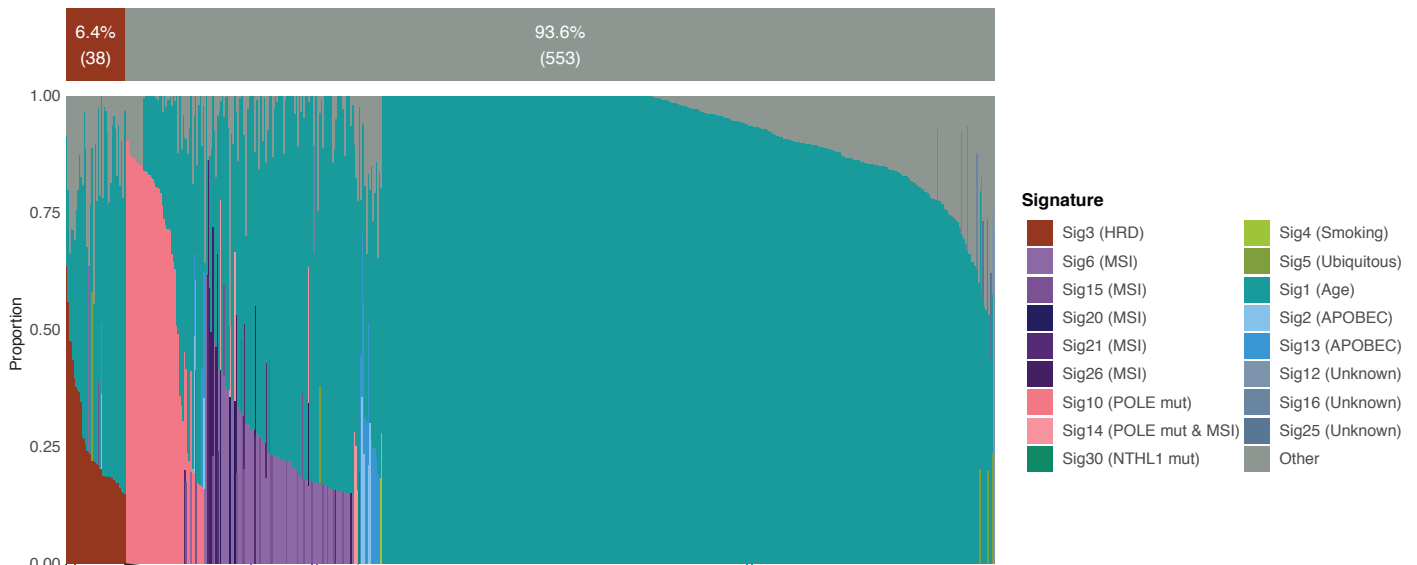

c)

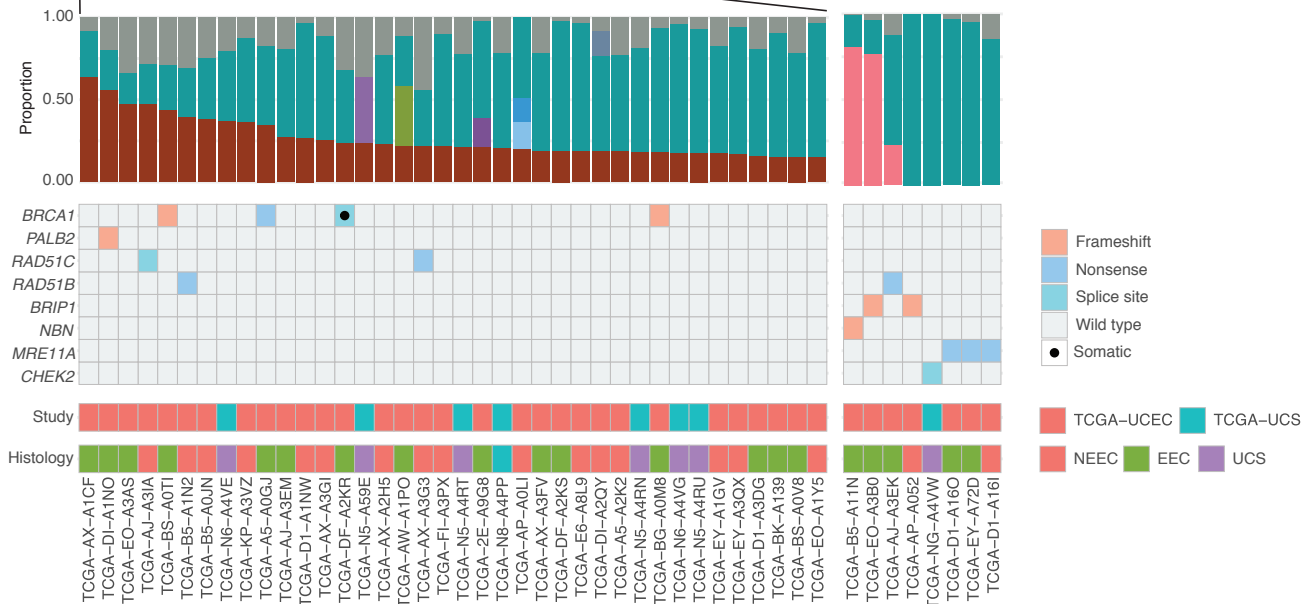

Source: https://biorxiv.org/content/10.1101/2021.03.30.436914v1.full.pdf
